# Supplementary material for: Key-to-lock halogen bond-based tetragonal pyramidal association of iodonium cations with the lacune rims of beta-octamolybdate
Source: Royal Society of Chemistry journal article supplement (doi:10.1039/d4sc01695e), 2024-01-01
Supplement: d4sc01695e1.pdf [file d4sc01695e1.pdf]

## SUPPORTING INFORMATION

### Key-to-Lock Halogen Bond-Based Tetragonal Pyramidal Association of Iodonium Cations with the Lacune Rims of Beta-Octamolybdate

Natalia S. Soldatova,<sup>1</sup> Amirbek D. Radzhabov,<sup>1</sup> Daniil M. Ivanov,<sup>1,2</sup> Sergi Burguera,<sup>3</sup> Antonio Frontera,<sup>3</sup> Pavel A. Abramov,<sup>1,4\*</sup> Pavel S. Postnikov,<sup>1,5\*</sup> and Vadim Yu. Kukushkin<sup>2,6\*</sup>

1. Research School of Chemistry and Applied Biomedical Sciences, Tomsk Polytechnic University, Tomsk 634050, Russian Federation
2. Institute of Chemistry, Saint Petersburg State University, Universitetskaya Nab. 7/9, Saint Petersburg 199034, Russian Federation
3. Department of Chemistry, Universitat de les Illes Balears, Crta. de Valldemossa km 7.5, 07122 Palma de Mallorca (Balears), Spain
4. Nikolaev Institute of Inorganic Chemistry SB RAS, 3 Acad. Lavrentiev Av., Novosibirsk, 630090, Russian Federation
5. Department of Solid State Engineering, Institute of Chemical Technology, Prague 16628, Czech Republic
6. Institute of Chemistry and Pharmaceutical Technologies, Altai State University, 656049 Barnaul, Russian Federation

#### Table of contents:

|                                                                                                            |    |
|------------------------------------------------------------------------------------------------------------|----|
| Table S1. Lengths ( <i>d</i> ) and angles ( $\varphi$ ) of halogen bonds with polyoxometalate anions ..... | 2  |
| Section S1. Chalcogen bond with DMSO.....                                                                  | 3  |
| Section S2. Combined QTAIM and NCIPLOT analysis of <b>2</b> , <b>4</b> , and <b>5</b> .....                | 6  |
| Section S3. NBOs involved in the XBs observed in <b>2</b> , <b>4</b> , and <b>5</b> .....                  | 8  |
| Section S4. MEP surface of [Mo <sub>8</sub> O <sub>26</sub> ] <sup>4-</sup> isomers .....                  | 9  |
| Table S2. Crystal data and structure refinement.....                                                       | 10 |
| Section S5. Crystal packing of <b>1–5</b> .....                                                            | 12 |
| Section S6. Synthetic work and crystal growth .....                                                        | 17 |
| Section S7. Powder XRD pattern of <b>1</b> , <b>2</b> , and <b>4</b> .....                                 | 19 |
| Section S8. FTIR spectra of <b>1</b> , <b>2</b> , and <b>4</b> .....                                       | 20 |
| Section S9. High resolution mass spectrometry of <b>1</b> , <b>2</b> and <b>4</b> .....                    | 21 |
| References.....                                                                                            | 24 |

**Table S1.** Lengths ( $d$ ) and angles ( $\varphi$ ) of halogen bonds with polyoxometalate anions

| Compound                                                                                                                                                   | Contact       | $d$ , Å  | $\varphi$ , ° | Reference         |
|------------------------------------------------------------------------------------------------------------------------------------------------------------|---------------|----------|---------------|-------------------|
| (2-IpyH) <sub>3</sub> (2-Ipy)[PMo <sub>12</sub> O <sub>40</sub> ]·3EtOH                                                                                    | C6–I2...O31   | 3.136(5) | 167.8(2)      | Ref. <sup>1</sup> |
|                                                                                                                                                            | C11–I3...O15  | 3.002(3) | 172.2(5)      |                   |
| (3-IpyH) <sub>3</sub> (3-Ipy) <sub>2</sub> [PMo <sub>12</sub> O <sub>40</sub> ]·H <sub>2</sub> O                                                           | C2–I1...O1    | 3.243(4) | 170.1(8)      |                   |
|                                                                                                                                                            | C17–I4...O12  | 3.326(5) | 167.9(3)      |                   |
|                                                                                                                                                            | C12–I3...O28  | 3.382(7) | 155.1(4)      |                   |
|                                                                                                                                                            | C12–I3...O35  | 3.262(5) | 159.4(3)      |                   |
| (4-IpyH) <sub>3</sub> [PMo <sub>12</sub> O <sub>40</sub> ]·EtOAc·H <sub>2</sub> O                                                                          | C22–I5...O8   | 3.136(2) | 165.9(4)      |                   |
|                                                                                                                                                            | C3–I1...O44   | 3.195(6) | 168.5(6)      |                   |
| (4-IpyH) <sub>3</sub> [PMo <sub>12</sub> O <sub>40</sub> ]                                                                                                 | C13–I3...O8   | 3.496(6) | 171.8(6)      |                   |
|                                                                                                                                                            | C3–I1...O10   | 3.317(8) | 166.7(4)      |                   |
| (3-IpyEt) <sub>4</sub> [PMo <sub>12</sub> O <sub>40</sub> ]                                                                                                | C2–I1...O16   | 3.029(2) | 167.3(2)      |                   |
|                                                                                                                                                            | C9–I2...O34   | 3.098(2) | 165.2(2)      |                   |
|                                                                                                                                                            | C16–I3...O4   | 2.986(2) | 169.2(9)      |                   |
|                                                                                                                                                            | C23–I4...O27  | 3.055(1) | 168.0(9)      |                   |
| (3-BrpyEt) <sub>4</sub> [PMo <sub>12</sub> O <sub>40</sub> ]                                                                                               | C2–Br1...O1   | 3.233(3) | 164.7(8)      |                   |
|                                                                                                                                                            | C9–Br2...O28  | 2.944(6) | 163.1(9)      |                   |
|                                                                                                                                                            | C16–Br3...O4  | 3.117(4) | 149.5(9)      |                   |
| (35-BrpyEt) <sub>3</sub> [PMo <sub>12</sub> O <sub>40</sub> ]·4.5DMSO                                                                                      | C2–Br1...O39  | 3.130(4) | 170.3(3)      |                   |
|                                                                                                                                                            | C4–Br2...O22  | 3.185(3) | 173.7(7)      |                   |
|                                                                                                                                                            | C18–Br6...O24 | 3.316(2) | 167.4(7)      |                   |
| [(3IPy) <sub>2</sub> Bu] <sub>2</sub> [PMo <sub>12</sub> O <sub>40</sub> ]Br                                                                               | C11–I2...O19  | 3.296(5) | 161.8(7)      |                   |
| [(3IPy) <sub>2</sub> Bu] <sub>2</sub> [PMo <sub>12</sub> O <sub>40</sub> ]·2DMSO                                                                           | C2–I1...O10   | 3.114(2) | 157.6(2)      |                   |
|                                                                                                                                                            | C9–I2...O6    | 3.279(9) | 153.9(5)      |                   |
| [(3-IpyEt) <sub>2</sub> (3-IpyH)][PW <sub>12</sub> O <sub>40</sub> ]·DMSO                                                                                  | C2–I1...O17   | 3.413(5) | 161.7(3)      |                   |
|                                                                                                                                                            | C9–I3...O33   | 3.038(3) | 168.8(9)      |                   |
| (Bu <sub>4</sub> N) <sub>2</sub> [β-{Ag(py-Cl)} <sub>2</sub> Mo <sub>8</sub> O <sub>26</sub> ]                                                             | C4–Cl1...O6   | 3.252(5) | 175.5(2)      | Ref. <sup>2</sup> |
| (Bu <sub>4</sub> N) <sub>2</sub> [β-{Ag(py-Br)} <sub>2</sub> Mo <sub>8</sub> O <sub>26</sub> ]                                                             | C24–Br1...O3  | 3.197(5) | 173.9(2)      |                   |
| (Bu <sub>4</sub> N) <sub>2</sub> [β-{Ag(py-I)} <sub>2</sub> Mo <sub>8</sub> O <sub>26</sub> ]                                                              | C4–I1...O1    | 3.217(5) | 171.5(2)      |                   |
| (TBA) <sub>3</sub> [MnMo <sub>6</sub> O <sub>18</sub> {(OCH <sub>2</sub> ) <sub>3</sub> CNHCO(C <sub>6</sub> H <sub>4</sub> - <i>p</i> -I)} <sub>2</sub> ] | C9–I1...O3    | 3.045(5) | 167.5(2)      | Ref. <sup>3</sup> |
| (Ph <sub>2</sub> I) <sub>4</sub> [Mo <sub>8</sub> O <sub>26</sub> ]·3DMF·H <sub>2</sub> O                                                                  | C43–I4...O31  | 2.933(5) | 170.0(2)      | Ref. <sup>4</sup> |
|                                                                                                                                                            | C7–I1...O19   | 2.908(5) | 168.5(2)      |                   |
|                                                                                                                                                            | C19–I2...O39  | 3.242(5) | 159.0(2)      |                   |
|                                                                                                                                                            | C13–I2...O42  | 2.830(5) | 174.7(2)      |                   |
|                                                                                                                                                            | C31–I3...O4   | 2.973(5) | 168.1(2)      |                   |
|                                                                                                                                                            | C25–I3...O6   | 2.821(5) | 165.3(2)      |                   |
| [MoO <sub>2</sub> (SMB)(py)] <sup>a</sup>                                                                                                                  | C2–I1...O4    | 3.132(5) | 167.7(2)      | Ref. <sup>5</sup> |
| MoO <sub>2</sub> (SMB)(3-pic) <sup>a</sup>                                                                                                                 | C2–I1...O5    | 3.282(5) | 165.6(2)      |                   |
| [MoO <sub>2</sub> (DSMB)(H <sub>2</sub> O)](DMF) <sub>2</sub> <sup>b</sup>                                                                                 | C4–I2...O5    | 3.061(5) | 172.5(2)      | Ref. <sup>6</sup> |
| [MoO <sub>2</sub> (DSMB)(py)] <sup>b</sup>                                                                                                                 | C2–I1...O5    | 3.114(5) | 165.4(2)      |                   |
| {(C <sub>7</sub> H <sub>10</sub> N) <sub>2</sub> [Mo <sub>5</sub> O <sub>16</sub> ]} <sub>n</sub>                                                          | C1–I1...O8    | 3.129(5) | 167.7(2)      | Ref. <sup>7</sup> |

<sup>a</sup> H<sub>2</sub>SMB = 3,5-diiodosalicylaldehyde-4-methoxybenzoylhydrazone; <sup>b</sup> H<sub>2</sub>DSMB = 3,5-diiodosalicylaldehyde-4-methoxybenzoylhydrazone

## Section S1. Chalcogen bond with DMSO

In the structure of **2<sup>II</sup>**, the S1S atom of DMSO interact with O1C atom of the lacune rim to give noncovalent contacts, which belong to the chalcogen bonding category accordingly to the IUPAC criteria<sup>8</sup> ( $d(\text{S1S}\cdots\text{O1C}) = 3.189(2) \text{ \AA}$ ; the sum of Bondi vdW radii  $\Sigma_{\text{vdW}} \text{ S} + \text{ O} = 3.32 \text{ \AA}$ ;  $N_{\text{c}} = 0.96$ ,  $\angle\text{O1S-S1S}\cdots\text{O1C} = 172.18(15) \text{ \AA}$ ) and also with the I<sup>III</sup> site to give weak XB ( $d(\text{I1D}\cdots\text{S1S}) = 3.6728(11) \text{ \AA}$ ; the sum of Bondi vdW radii  $\Sigma_{\text{vdW}} \text{ I} + \text{ S} = 3.78 \text{ \AA}$ ;  $N_{\text{c}} = 0.97$ ,  $\angle\text{C1D-I1D}\cdots\text{S1S} = 150.16(10) \text{ \AA}$ ). In this case, the O1C atom of the lacune rim functions as a NCI acceptor for the synergetic chalcogen bonding and XB.<sup>9</sup>

As described above, the DMF and DMSO molecules also form XB and chalcogen bonding (ChB) interactions. Both have been also analyzed herein and the results are gathered in Figures A and B for the XBs and C for the ChB. The XB complex with DMSO (compound **2**, **Figure A**) is characterized by a BCP, bond path and blue RDG isosurface, confirming the existence and strong nature of the XB. An additional BCP and bond path connect one H-atom of the DMSO molecule to one C-atom of the phenyl ring. The size and shape of the RDG isosurface that characterizes this contact suggests that this can be classified as a  $\text{CH}\cdots\pi$  interaction. The XB energy derived from the  $V_{\text{b}}$  value is  $-8.0 \text{ kcal/mol}$ , comparable to the values found for the strongest and most directional anion $\cdots$ cation XBs described above. The NBO analysis Figure A(b,c) also demonstrates the existence of the typical  $\text{LP}(\text{O}) \rightarrow \sigma^*(\text{C-I})$  donor-acceptor interactions involving two LPs at the O-atom with concomitant stabilization energies of  $E(2) = 2.75$  and  $2.27 \text{ kcal/mol}$ .

The XB complex with DMF (compound **3**, **Figure B**) is characterized by a BCP, bond path and blue RDG isosurface, confirming the existence and strong nature of the XB. The interaction energy derived from the  $V_{\text{b}}$  value is  $-6.8 \text{ kcal/mol}$ , slightly weaker than that of the DMSO. The NBO analysis Figure B(b) also demonstrates the existence of the typical  $\text{LP}(\text{O}) \rightarrow \sigma^*(\text{C-I})$  donor-acceptor interaction with a concomitant stabilization energy of  $E(2) = 5.61 \text{ kcal/mol}$ , that is comparable to the total contribution of the DMSO complex in **2**.

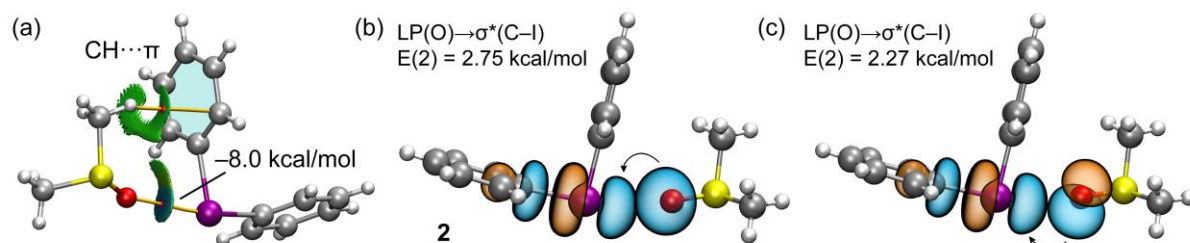

**Figure S1.** (a) Combined QTAIM (BCPs in red and bond path as solid orange lines) and NCIPLOT analysis (RDG = 0.5,  $\rho$  cut-off = 0.04, color range  $-0.04 \text{ a.u.} \leq (\text{sign}\lambda_2)^*\rho \leq 0.04 \text{ a.u.}$  of the DMSO dimer in **2**. The total I...O energy derived from the  $V_b$  value is indicated. Only intermolecular interactions are represented. (b,c) NBOs involved in the XB. The second order perturbation energies,  $E(2)$ , are also given.

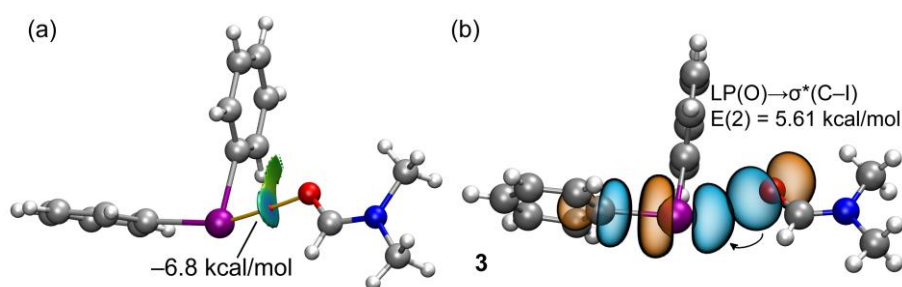

**Figure S2.** (a) Combined QTAIM (BCPs in red and bond path as solid orange lines) and NCIPLOT analysis (RDG = 0.5,  $\rho$  cut-off = 0.04, color range  $-0.04 \text{ a.u.} \leq (\text{sign}\lambda_2)^*\rho \leq 0.04 \text{ a.u.}$  of the DMF dimer in **3**. The total I...O energy derived from the  $V_b$  value is indicated. Only intermolecular interactions are represented. (b) NBOs involved in the XB. The second order perturbation energy,  $E(2)$ , is given.

Finally, the possible role of DMSO as ChB donor (**Figure 2C** in **section 2.1**) was analyzed and the results are gathered in **Figure C**. The combined QTAIM/NCIPLOT analysis confirms the existence of the S...O contact in cooperation with several CH...O HBs. All contacts are characterized by the corresponding BCPs, bond paths and green isosurfaces. In this case the contribution of the HBs is larger ( $-4.5 \text{ kcal/mol}$ ) than that of the chalcogen bond ( $-1.4 \text{ kcal/mol}$ ). The NBO analysis also confirms the  $\sigma$ -hole nature of the interaction disclosing a very modest LP(O) $\rightarrow\sigma$ (S-O) charge transfer with a stabilization energy of  $E(2) = 0.32 \text{ kcal/mol}$ , in line with the modest ability of sulfur to act as  $\sigma$ -hole donor.

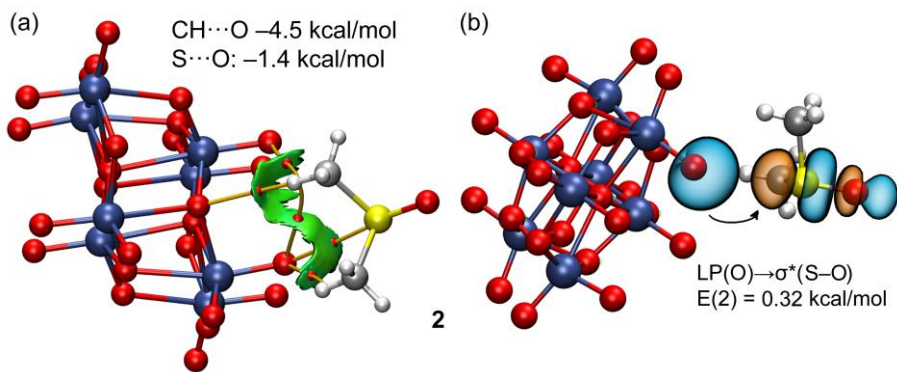

**Figure S3** (a) Combined QTAIM (BCPs in red and bond path as solid orange lines) and NCIPlot analysis (RDG = 0.5,  $\rho$  cut-off = 0.04, colour range  $-0.04$  a.u.  $\leq$   $(\text{sign}\lambda_2)^*\rho \leq 0.04$  a.u. of the DMSO $\cdots$ anion dimer in compound **2**. The total CH $\cdots$ O and S $\cdots$ O energies derived from the  $V_b$  values are indicated. Only intermolecular interactions are represented. (b) NBOs involved in the ChB. The second order perturbation energies, E(2), are also given.

## Section S2. Combined QTAIM and NCIplot analysis of 2, 4, and 5

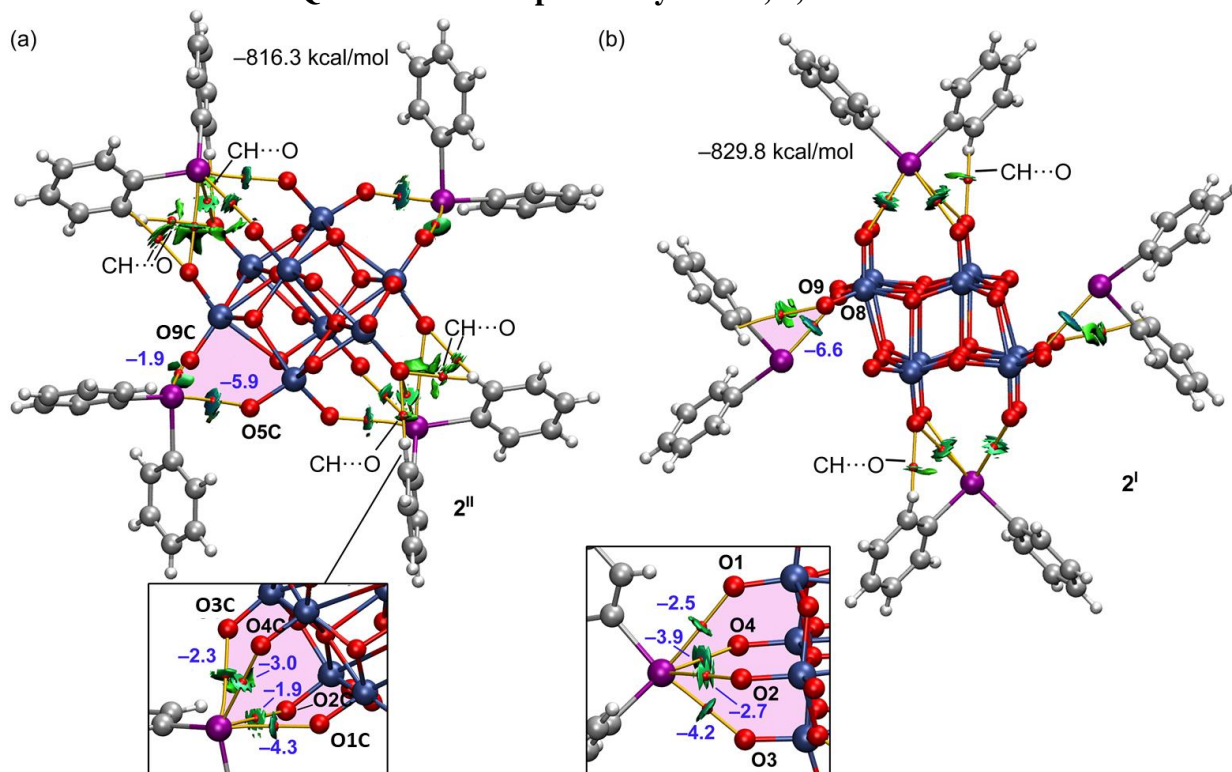

**Figure S4.** Combined QTAIM (BCPs in red and bond path as solid orange lines) and NCIplot analysis (RDG = 0.5,  $\rho$  cut-off = 0.04, color range  $-0.04$  a.u.  $\leq$   $(\text{sign}\lambda_2)*\rho \leq 0.04$  a.u.) of the pentameric assembly of compounds **2<sup>II</sup>** (a) and **2<sup>I</sup>**. The individual contributions of the XBs are indicated in blue adjacent to the BCPs. Only intermolecular interactions are represented.

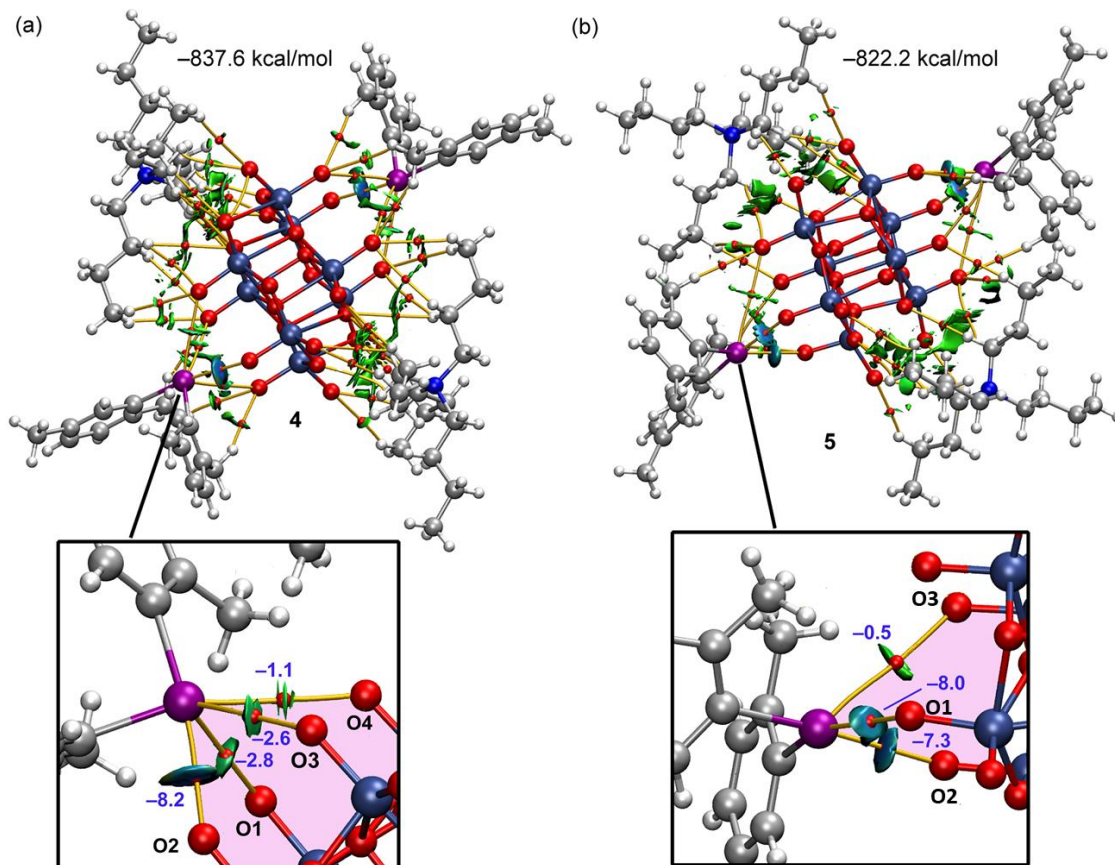

**Figure S5.** Combined QTAIM (BCPs in red and bond path as solid orange lines) and NCIplot analysis (RDG = 0.5,  $\rho$  cut-off = 0.04, color range  $-0.04 \text{ a.u.} \leq (\text{sign}\lambda_2) * \rho \leq 0.04 \text{ a.u.}$ ) of the pentameric assemblies of compounds **4** (a) and **5** (b). The interaction energy is also indicated. The individual contributions of the XBs are indicated in blue adjacent to the BCPs. Only intermolecular interactions are represented.

### Section S3. NBOs involved in the XBs observed in 2, 4, and 5

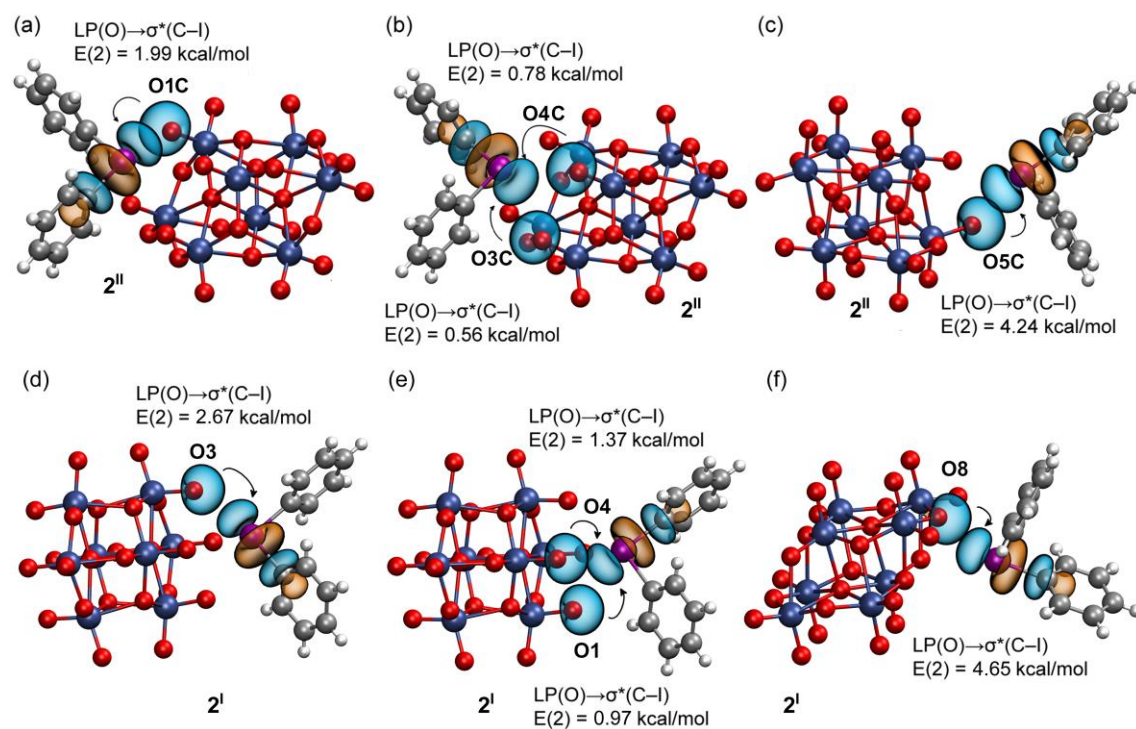

**Figure S6.** NBOs involved in the XBs observed in compound  $2^{II}$  (top panel) and  $2^I$  (lower panel) for the tetrafurcated (a,b,d,e) and bifurcated (c,f) binding modes. The second order perturbation analysis energies are also given,  $E(2)$ .

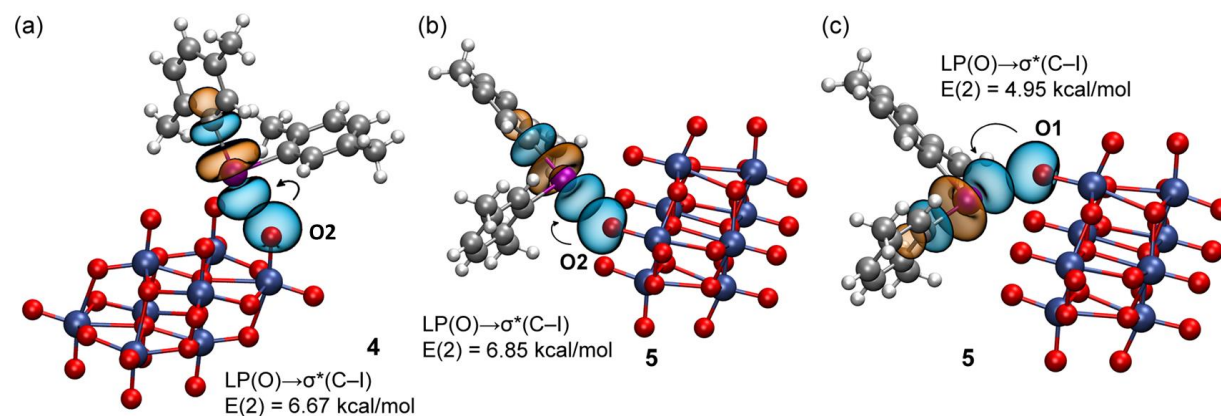

**Figure S7.** NBOs involved in the XBs observed in compound 4 (a) and 5 (b,c) compounds. The second order perturbation analysis energies are also given,  $E(2)$ .



#### Section S4. MEP surface of $[\text{Mo}_8\text{O}_{26}]^{4-}$ isomers

MEP surface calculations performed for  $\alpha$ ,  $\beta$ ,  $\gamma$ , and  $\delta$ - $[\text{Mo}_8\text{O}_{26}]^{4-}$  isomeric anions (**Figure S8**) and it was revealed that the non-lacunar  $\alpha$ ,  $\gamma$ , and  $\delta$ - $[\text{Mo}_8\text{O}_{26}]^{4-}$  anions<sup>10</sup> exhibit  $V_{s,\text{min}}$  values up to approx.  $-280$  kcal/mol, while the only lacunar  $\beta$ - $[\text{Mo}_8\text{O}_{26}]^{4-}$  anion exhibits the most negative sites ( $-290.5$  kcal/mol) associated with the lacunae. The obtained data validated our hypothesis that the interactions with the lacunae of  $\beta$ - $[\text{Mo}_8\text{O}_{26}]^{4-}$  are more preferable from both electrostatic and geometrical viewpoints than idonium interactions with the other sites in the non-lacunar anions (for detailed discussion see **section 2.5**).

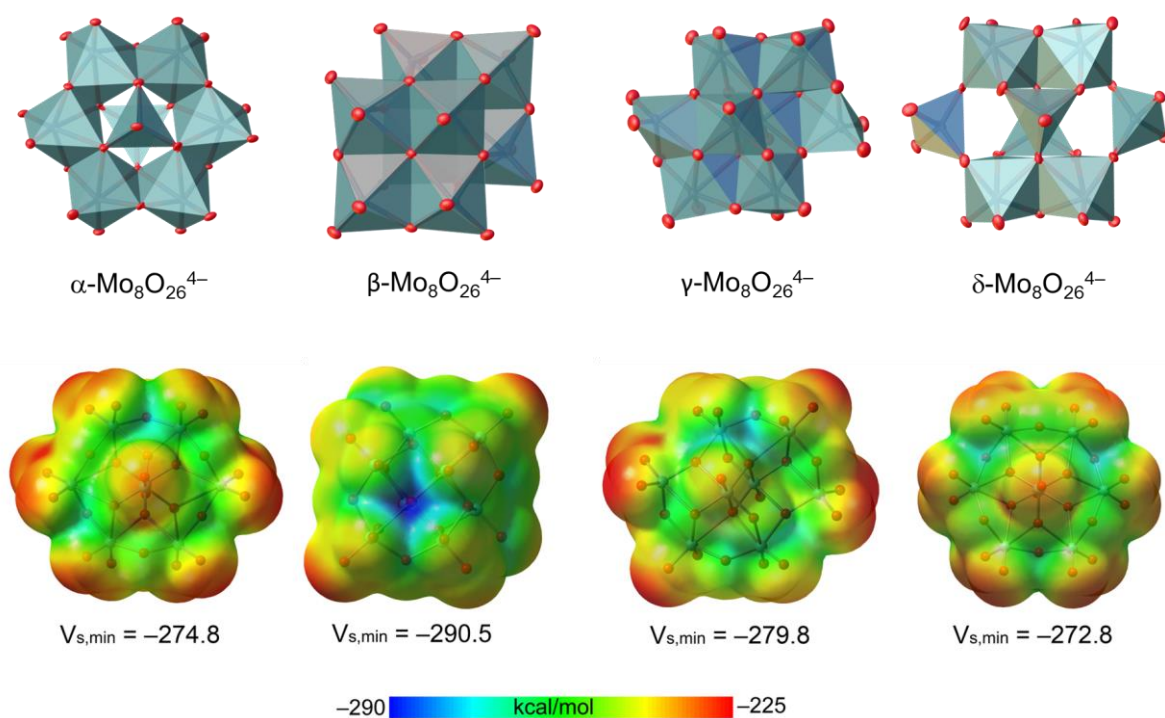

**Figure S8.** MEP surface (isodensity 0.001 a.u.) of  $[\text{Mo}_8\text{O}_{26}]^{4-}$  isomers. The MEP minimum values are given in kcal/mol.

**Table S2.** Crystal data and structure refinement.

| Identification code                            | <b>1</b>                                  | <b>2</b>                            | <b>3</b>                            | <b>4</b>                            | <b>5</b>                            |
|------------------------------------------------|-------------------------------------------|-------------------------------------|-------------------------------------|-------------------------------------|-------------------------------------|
| CCDC number                                    | 2334362                                   | 2334363                             | 2334360                             | 2334364                             | 2334361                             |
| Empirical formula                              | $C_{79.8}H_{106.2}N_{2.6}O_{28.6}Mo_8I_4$ | $C_{52}H_{52}O_{28}S_2Mo_8I_4$      | $C_{54}H_{54}N_2O_{28}Mo_8I_4$      | $C_{64}H_{108}O_{26}Mo_8I_2N_2$     | $C_{68}H_{118}N_2O_{27}Mo_8I_2$     |
| Formula weight                                 | 2834.59                                   | 2464.17                             | 2454.11                             | 2342.84                             | 2416.96                             |
| Temperature/K                                  | 150(2)                                    | 150(2)                              | 150(2)                              | 150(2)                              | 150(2)                              |
| Crystal system                                 | triclinic                                 | triclinic                           | triclinic                           | monoclinic                          | monoclinic                          |
| Space group                                    | P-1                                       | P-1                                 | P-1                                 | P <sub>2</sub> /c                   | P <sub>2</sub> /c                   |
| a/Å                                            | 13.9442(4)                                | 13.0495(3)                          | 12.7533(3)                          | 15.7278(3)                          | 15.9198(3)                          |
| b/Å                                            | 14.7482(4)                                | 14.4726(3)                          | 12.7583(3)                          | 16.3027(3)                          | 19.5787(4)                          |
| c/Å                                            | 14.7605(4)                                | 20.8666(5)                          | 13.1803(3)                          | 18.7455(3)                          | 14.9460(3)                          |
| $\alpha/^\circ$                                | 61.0800(10)                               | 100.4640(10)                        | 69.875(2)                           | 90                                  | 90                                  |
| $\beta/^\circ$                                 | 81.7340(10)                               | 98.6000(10)                         | 64.408(2)                           | 110.5660(10)                        | 98.520(2)                           |
| $\gamma/^\circ$                                | 65.7040(10)                               | 115.2890(10)                        | 68.367(2)                           | 90                                  | 90                                  |
| Volume/Å <sup>3</sup>                          | 2415.85(12)                               | 3387.69(14)                         | 1753.71(8)                          | 4500.13(14)                         | 4607.09(16)                         |
| Z                                              | 1                                         | 2                                   | 1                                   | 2                                   | 2                                   |
| $\rho_{\text{calc}}/\text{cm}^3$               | 1.948                                     | 2.416                               | 2.324                               | 1.729                               | 1.742                               |
| $\mu/\text{mm}^{-1}$                           | 2.355                                     | 3.396                               | 3.223                               | 1.829                               | 1.790                               |
| F(000)                                         | 1380.0                                    | 2336.0                              | 1164.0                              | 2312.0                              | 2396.0                              |
| Crystal size/mm <sup>3</sup>                   | 0.12 × 0.1 × 0.06                         | 0.15 × 0.1 × 0.07                   | 0.3 × 0.2 × 0.1                     | 0.1 × 0.1 × 0.08                    | 0.3 × 0.2 × 0.1                     |
| Radiation                                      | MoK $\alpha$ ( $\lambda$ = 0.71073)       | MoK $\alpha$ ( $\lambda$ = 0.71073) | MoK $\alpha$ ( $\lambda$ = 0.71073) | MoK $\alpha$ ( $\lambda$ = 0.71073) | MoK $\alpha$ ( $\lambda$ = 0.71073) |
| 2 $\theta$ range for data collection/ $^\circ$ | 5.404 to 57.422                           | 4.068 to 59.194                     | 3.666 to 58.098                     | 4.878 to 61.076                     | 4.16 to 58.382                      |

|                                                |                                                                        |                                                                        |                                                                        |                                                                        |                                                                        |
|------------------------------------------------|------------------------------------------------------------------------|------------------------------------------------------------------------|------------------------------------------------------------------------|------------------------------------------------------------------------|------------------------------------------------------------------------|
| Index ranges                                   | $-18 \leq h \leq 18,$<br>$-19 \leq k \leq 19,$<br>$-19 \leq l \leq 19$ | $-18 \leq h \leq 18,$<br>$-20 \leq k \leq 20,$<br>$-28 \leq l \leq 28$ | $-17 \leq h \leq 17,$<br>$-15 \leq k \leq 17,$<br>$-16 \leq l \leq 15$ | $-21 \leq h \leq 22,$<br>$-23 \leq k \leq 21,$<br>$-26 \leq l \leq 26$ | $-20 \leq h \leq 19,$<br>$-26 \leq k \leq 26,$<br>$-15 \leq l \leq 19$ |
| Reflections collected                          | 35741                                                                  | 54964                                                                  | 16766                                                                  | 83912                                                                  | 24632                                                                  |
| Independent reflections                        | 12209<br>[ $R_{\text{int}} = 0.0270,$<br>$R_{\text{sigma}} = 0.0310$ ] | 18461<br>[ $R_{\text{int}} = 0.0310,$<br>$R_{\text{sigma}} = 0.0366$ ] | 7792<br>[ $R_{\text{int}} = 0.0222,$<br>$R_{\text{sigma}} = 0.0351$ ]  | 13758<br>[ $R_{\text{int}} = 0.0369,$<br>$R_{\text{sigma}} = 0.0275$ ] | 10435<br>[ $R_{\text{int}} = 0.0197,$<br>$R_{\text{sigma}} = 0.0276$ ] |
| Data/restraints/parameters                     | 12209/1/563                                                            | 18461/0/863                                                            | 7792/0/439                                                             | 13758/0/463                                                            | 10435/0/495                                                            |
| Goodness-of-fit on $F^2$                       | 1.042                                                                  | 1.065                                                                  | 1.040                                                                  | 1.050                                                                  | 1.058                                                                  |
| Final R indexes [ $I \geq 2\sigma(I)$ ]        | $R_1 = 0.0259,$<br>$wR_2 = 0.0636$                                     | $R_1 = 0.0306,$<br>$wR_2 = 0.0694$                                     | $R_1 = 0.0304,$<br>$wR_2 = 0.0740$                                     | $R_1 = 0.0225,$<br>$wR_2 = 0.0464$                                     | $R_1 = 0.0273,$<br>$wR_2 = 0.0741$                                     |
| Final R indexes [all data]                     | $R_1 = 0.0296,$<br>$wR_2 = 0.0654$                                     | $R_1 = 0.0401,$<br>$wR_2 = 0.0720$                                     | $R_1 = 0.0417,$<br>$wR_2 = 0.0780$                                     | $R_1 = 0.0311,$<br>$wR_2 = 0.0479$                                     | $R_1 = 0.0343,$<br>$wR_2 = 0.0767$                                     |
| Largest diff. peak/hole / $e \text{ \AA}^{-3}$ | 0.82/-0.71                                                             | 2.55/-1.47                                                             | 2.45/-0.94                                                             | 0.43/-0.48                                                             | 2.52/-1.03                                                             |

Section S5. Crystal packing of 1–5

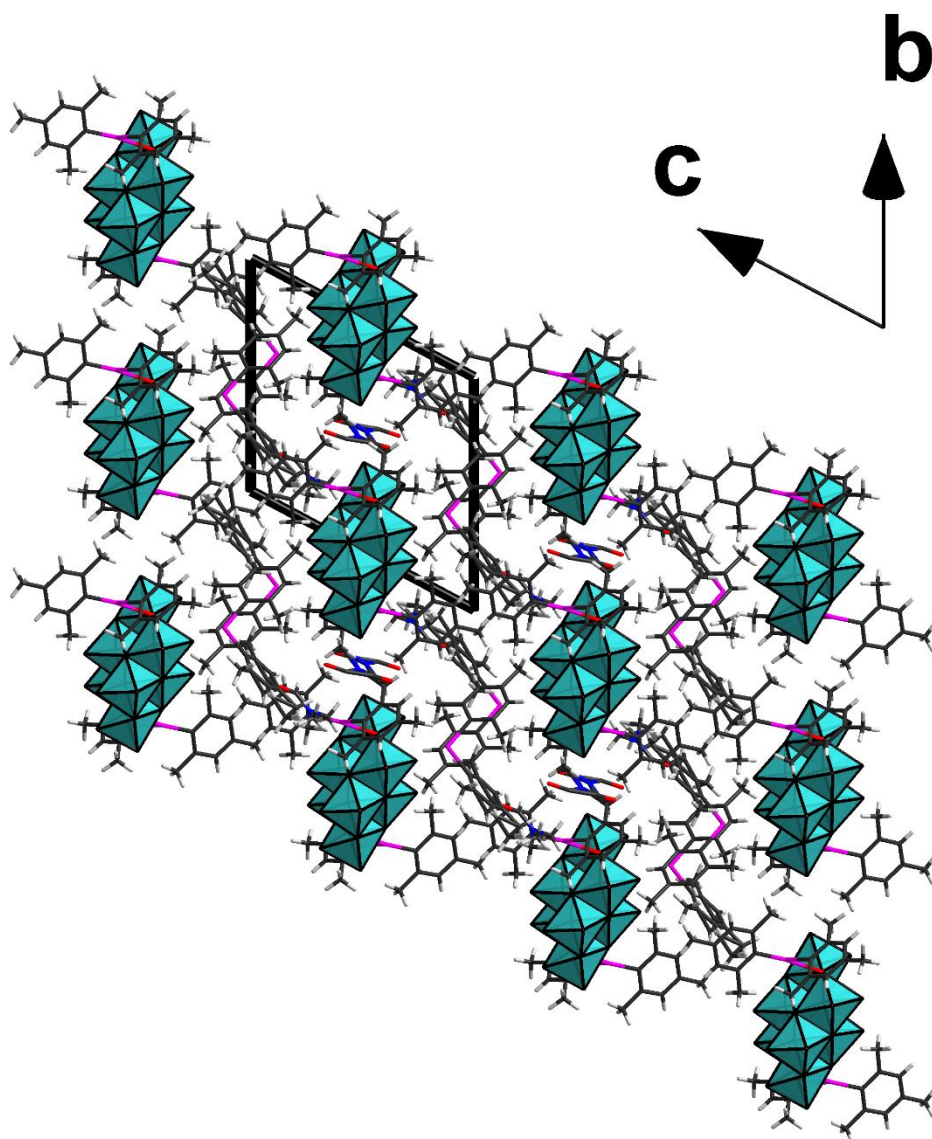

**Figure S9.** Crystal packing of **1** along [100] crystal direction.

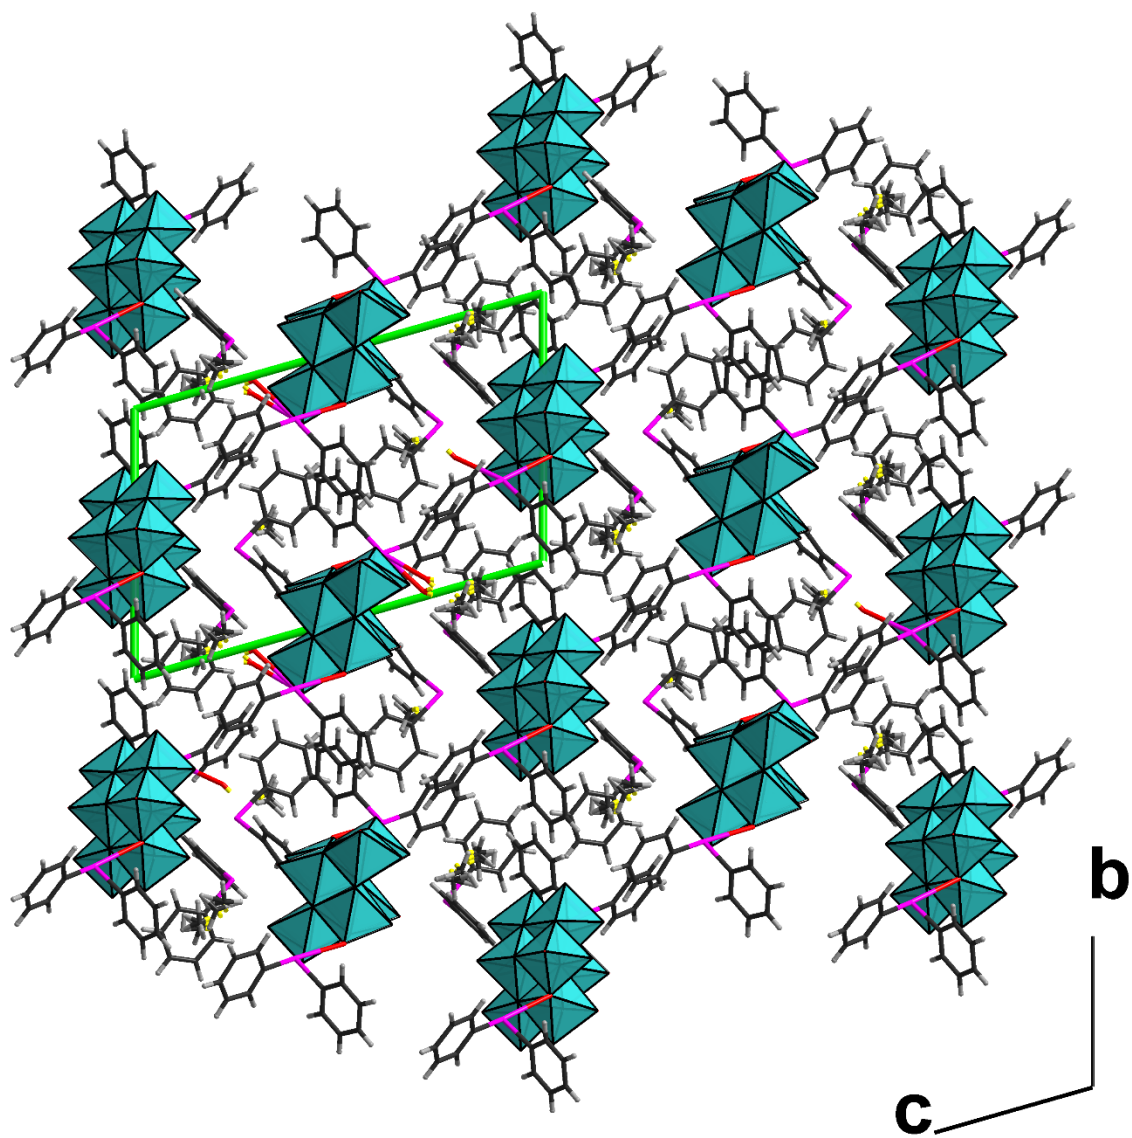

**Figure S10.** Crystal packing of **2** along [100] crystal direction.

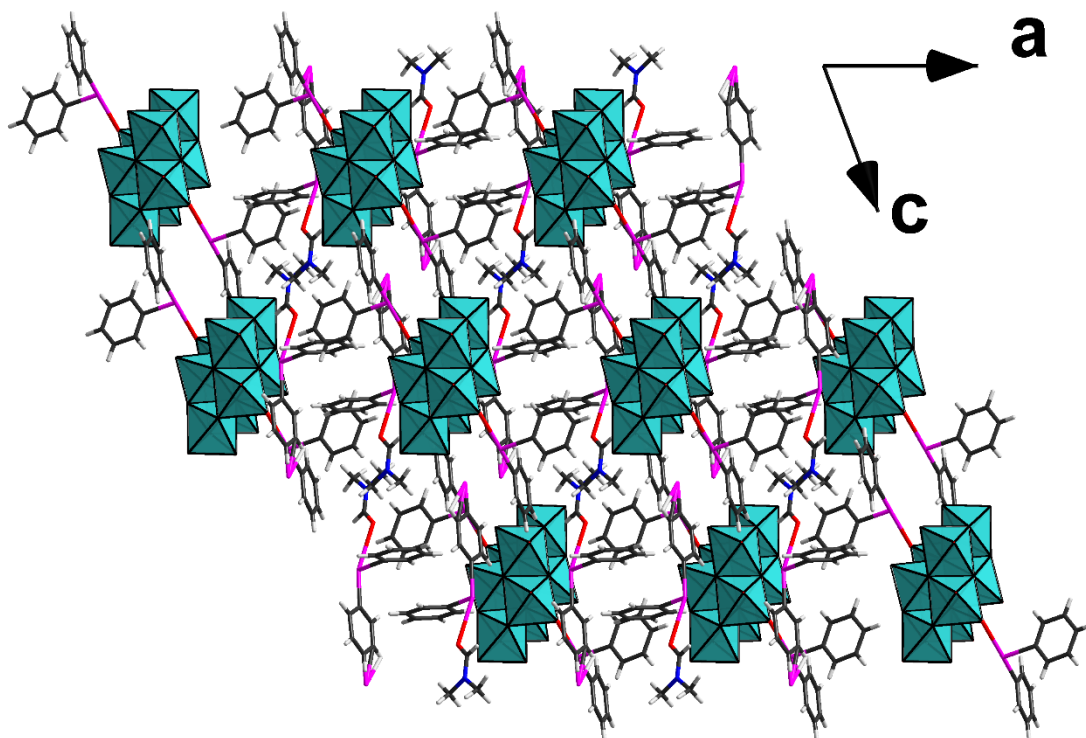

**Figure S11.** Crystal packing of **3** along [010] crystal direction.

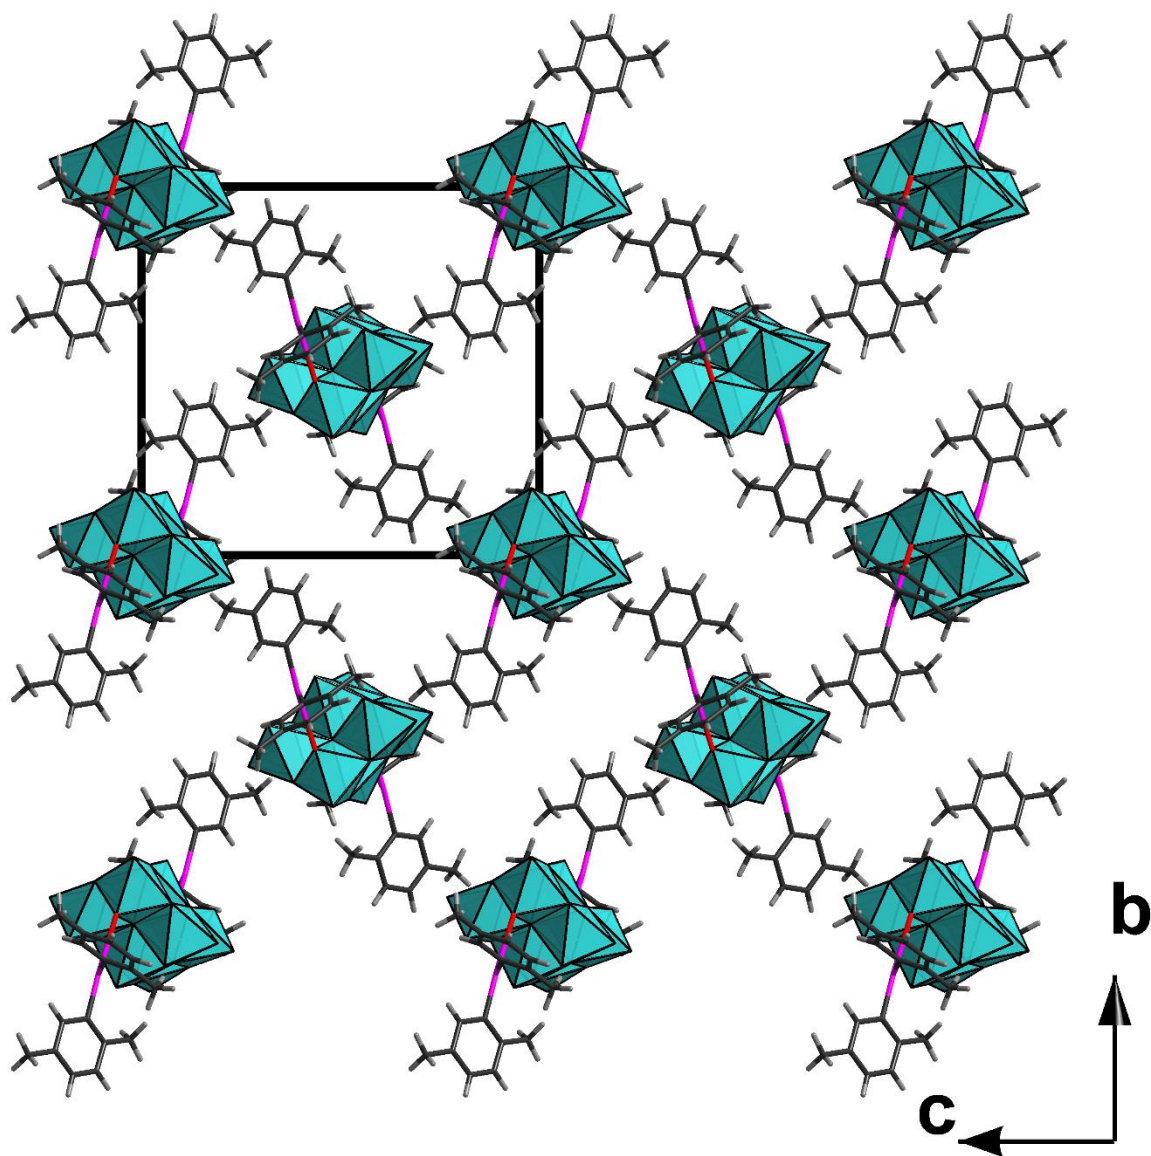

**Figure S12.** Crystal packing of **4** along [100] crystal direction.

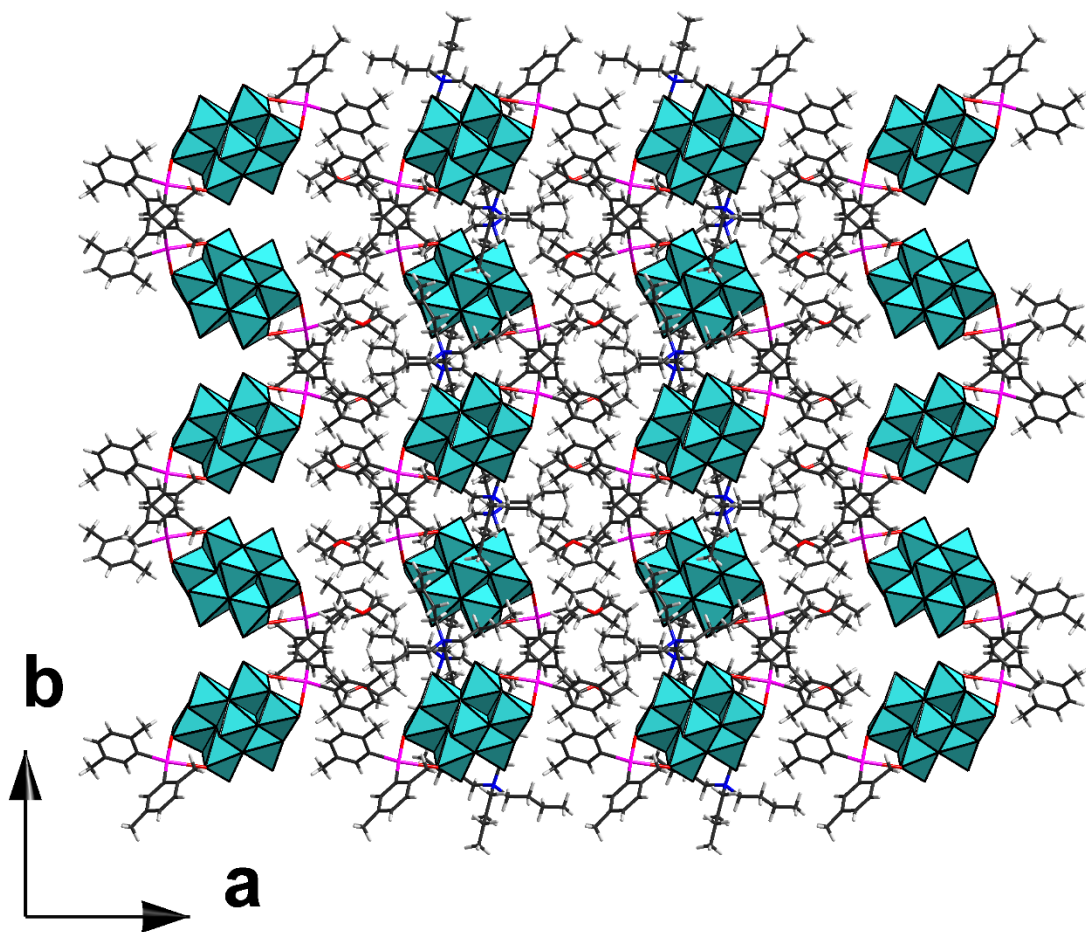

**Figure S13.** Crystal packing of **5** along [001] crystal direction.



## Section S6. Synthetic work and crystal growth

(Mes<sub>2</sub>I)<sub>4</sub>[Mo<sub>8</sub>O<sub>26</sub>]·2.6DMF (**1**). (*n*-Bu<sub>4</sub>N)<sub>4</sub>[β-Mo<sub>8</sub>O<sub>26</sub>] (100 mg, 0.046 mmol) was dissolved in freshly distilled DMF (2 mL) under ultrasonic treatment and stirring, whereupon the solid compound (Mes<sub>2</sub>I)CF<sub>3</sub>SO<sub>3</sub> (95 mg, 0.184 mmol) was added. The mixture was placed in a desiccator in Et<sub>2</sub>O atmosphere at 5 °C and after 1 d a crop of released block colorless crystals was separated by filtration. The crude product was washed with Et<sub>2</sub>O (2 × 6 mL) and dried in air at room temperature to give **1** as the colorless crystalline solid (90 mg, 69%). The phase purity was confirmed by XRPD (Section S6, the ESI). Elemental analyses: Calc. for C<sub>79.8</sub>H<sub>106.2</sub>I<sub>4</sub>Mo<sub>8</sub>N<sub>2.6</sub>O<sub>28.6</sub> C, H, N (%): 33.8, 3.8, 1.3. Found C, H, N (%): 33.7, 3.9, 1.5. IR (KBr, selected bands, cm<sup>-1</sup>): 914 ν(Mo=O), 902 ν(Mo=O), 841 ν(Mo–O–Mo), 729 ν(Mo–O–Mo), 708 ν(Mo–O–Mo), 657 ν(C–I).

(Ph<sub>2</sub>I)<sub>4</sub>[Mo<sub>8</sub>O<sub>26</sub>]·2DMSO (**2**): (*n*-Bu<sub>4</sub>N)<sub>4</sub>[β-Mo<sub>8</sub>O<sub>26</sub>] (100 mg, 0.046 mmol) was dissolved in freshly distilled DMSO (2 mL) under ultrasonic treatment and stirring, whereupon the solid compound (Ph<sub>2</sub>I)CF<sub>3</sub>SO<sub>3</sub> (80 mg, 0.184 mmol) was added. The mixture was placed in a desiccator in <sup>i</sup>PrOH atmosphere at room temperature and after 3 d a crop of block colorless crystals was separated by filtration. The crude product was washed with Et<sub>2</sub>O (2 × 6 mL) and dried in air at room temperature to give **2** as the colorless crystalline solid (101 mg, 91%). The phase purity was confirmed by XRPD (Section S6, the ESI). Elemental analyses: Calc. for C<sub>52</sub>H<sub>52</sub>I<sub>4</sub>Mo<sub>8</sub>O<sub>28</sub>S<sub>2</sub> C, H, S (%): 25.4, 2.1, 2.6. Found C, H, S (%): 25.4, 2.2, 2.7. IR (KBr, selected bands, cm<sup>-1</sup>): 908 ν(Mo=O), 893 ν(Mo=O), 842 ν(Mo–O–Mo), 705 ν(Mo–O–Mo), 652 ν(C–I).

(Xyl<sub>2</sub>I)<sub>2</sub>(*n*-Bu<sub>4</sub>N)<sub>2</sub>[Mo<sub>8</sub>O<sub>26</sub>] (**4**): (*n*-Bu<sub>4</sub>N)<sub>4</sub>[β-Mo<sub>8</sub>O<sub>26</sub>] (100 mg, 0.046 mmol) was dissolved in freshly distilled DMSO (2 mL) under stirring and ultrasonic treatment, whereupon the solid compound (Xy<sub>2</sub>I)CF<sub>3</sub>SO<sub>3</sub> (80 mg, 0.184 mmol) was added. The mixture was placed in a desiccator in <sup>i</sup>PrOH atmosphere at room temperature. Th released monophase crystals after 1 d were separated by filtration; longer storage of these crystals in the mother liquor led to their phase contamination. The separated crystals were washed consequently with <sup>i</sup>PrOH (2 × 6 mL) and Et<sub>2</sub>O (2 × 6 mL) and dried in air at room temperature to give **4** as the colorless crystalline solid (80 mg, 74%). In contrast to the studied single-crystal of **4**, which contain DMSO of solvation, the isolated product does not contain DMSO, which was lost during the isolation. The phase purity of the single-crystals and the isolated product was confirmed by XRPD (Section S6, the ESI). Elemental

analyses: Calc. for  $C_{64}H_{108}I_2Mo_8N_2O_{26}$  C, H, N (%): 32.8, 4.6, 1.2. Found C, H, N (%): 32.8, 4.6, 1.6. IR (KBr, selected bands,  $cm^{-1}$ ): 910  $\nu(Mo=O)$ , 896  $\nu(Mo=O)$ , 844  $\nu(Mo-O-Mo)$ , 732  $\nu(Mo-O-Mo)$ , 708  $\nu(Mo-O-Mo)$ , 658  $\nu(C-I)$ .

$(Ph_2I)_4[Mo_8O_{26}] \cdot 2DMF$  (**3**) and  $(Xyl_2I)_2(n-Bu_4N)_2[Mo_8O_{26}] \cdot Et_2O$  (**5**) were prepared and isolated similar to the procedure developed for **1**. According to the XRPD data, the phase composition is different depending on  $(R_2I)^+/n-Bu_4N^+$  ratios.

## Section S7. Powder XRD pattern of 1, 2, and 4

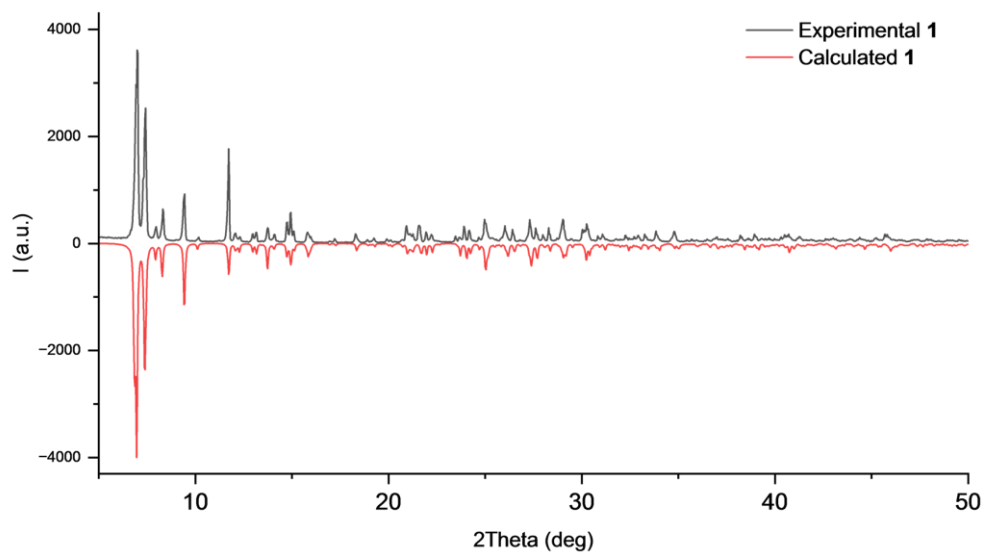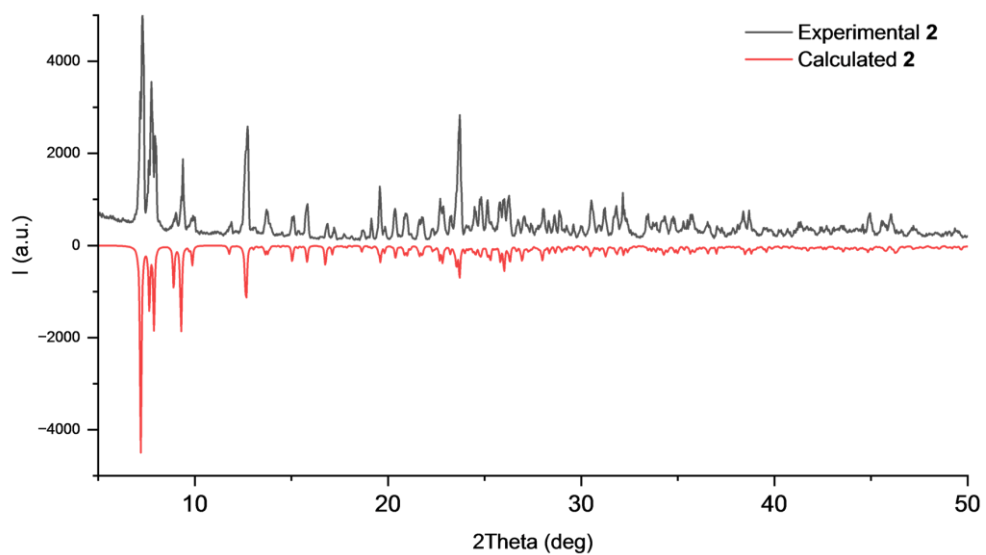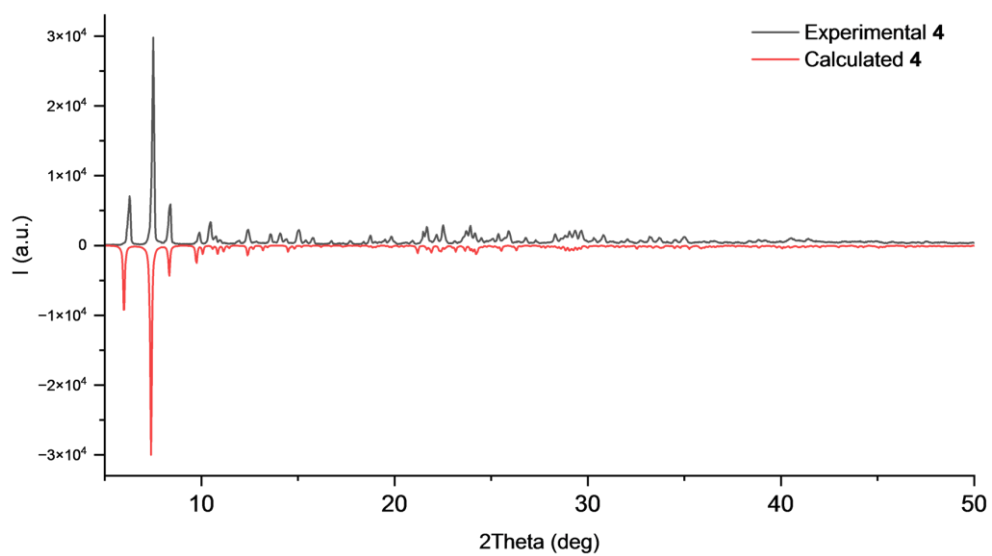

## Section S8. FTIR spectra of 1, 2, and 4

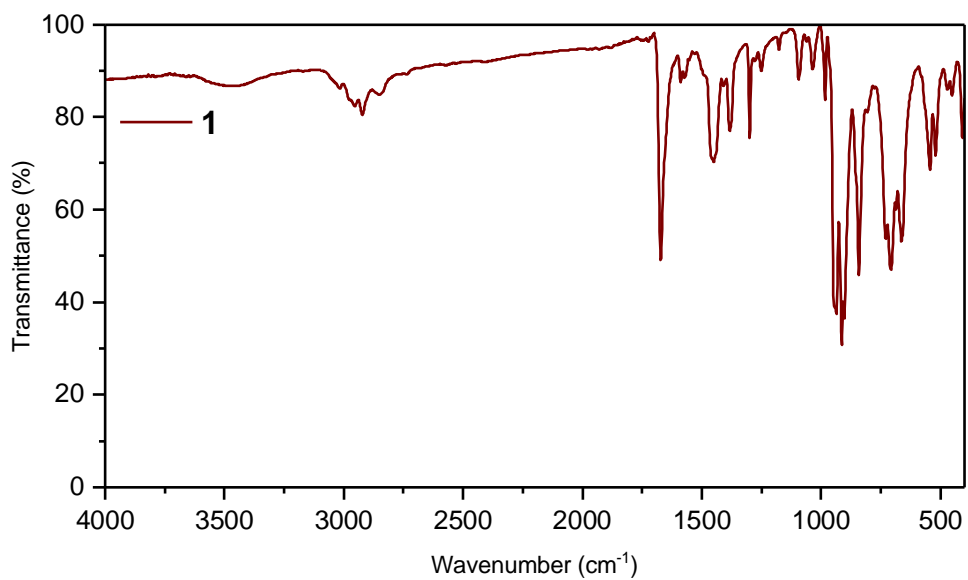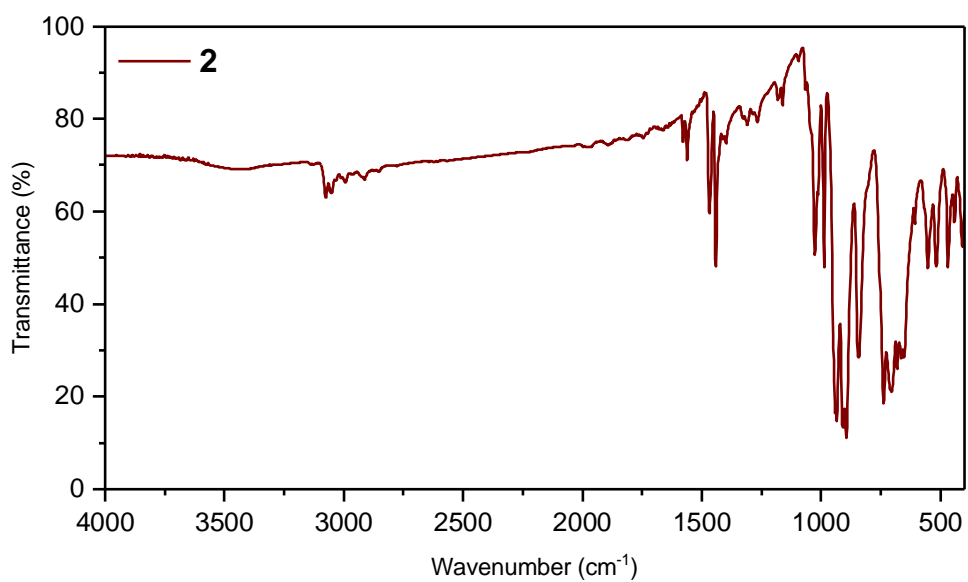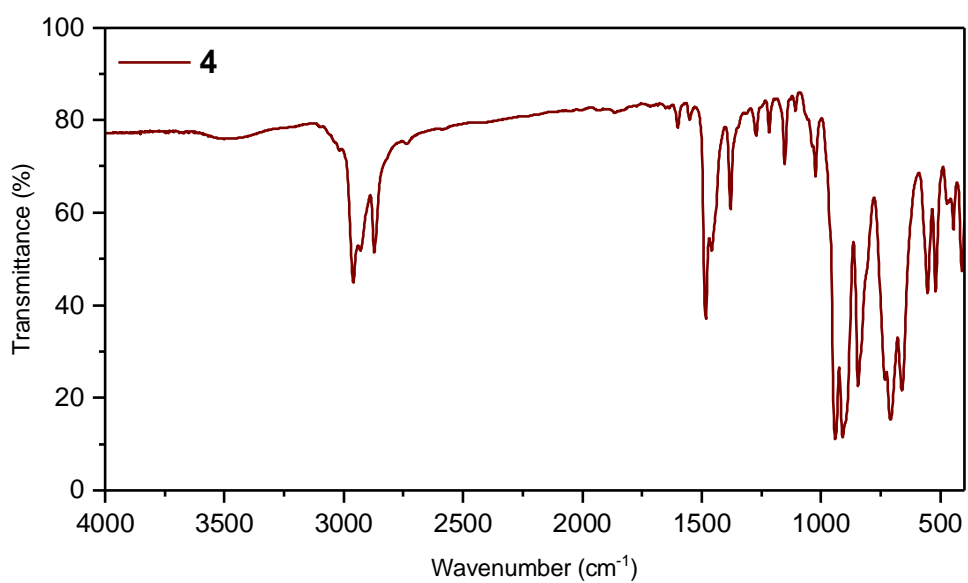

Section S9. High resolution mass spectrometry of 1, 2 and 4

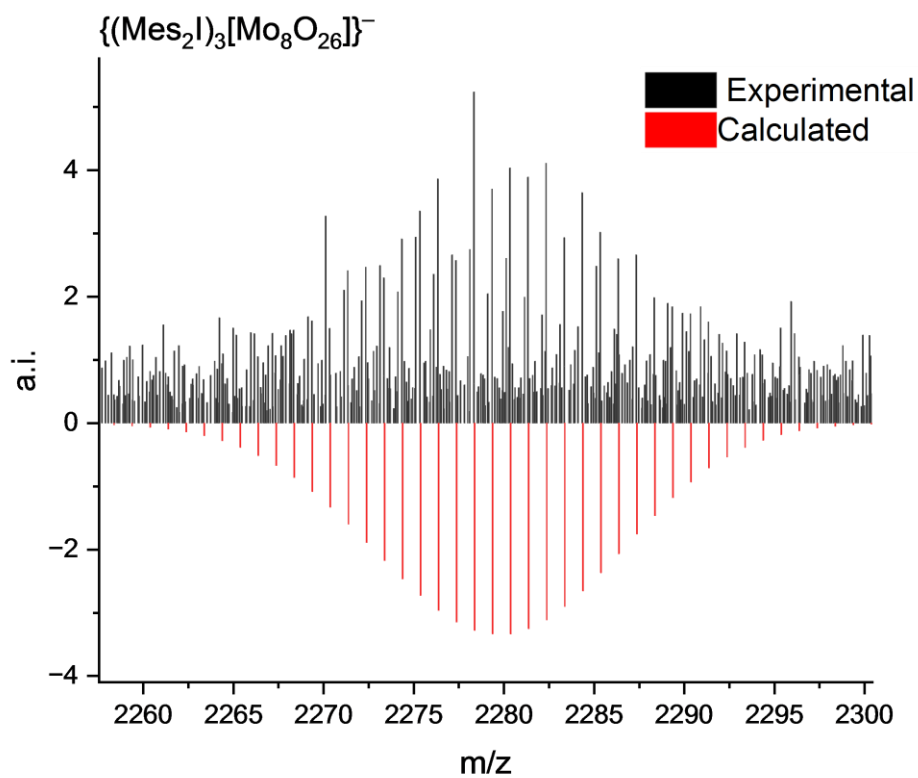

Table S3. ESI-MS spectra assignments for compound 1.

| Species                                                    | Charge mode | Chemical Formula                                                 | Calculated, m/z | Found, m/z |
|------------------------------------------------------------|-------------|------------------------------------------------------------------|-----------------|------------|
| $\{(\text{Mes}_2\text{I})_3[\text{Mo}_8\text{O}_{26}]\}^-$ | Negative    | $\text{C}_{54}\text{H}_{66}\text{I}_3\text{Mo}_8\text{O}_{26}^-$ | 2294.3414       | 2294.3467  |
| $\text{Mes}_2\text{I}^+$                                   | Positive    | $\text{C}_{18}\text{H}_{22}\text{I}^+$                           | 365.0761        | 365.0768   |

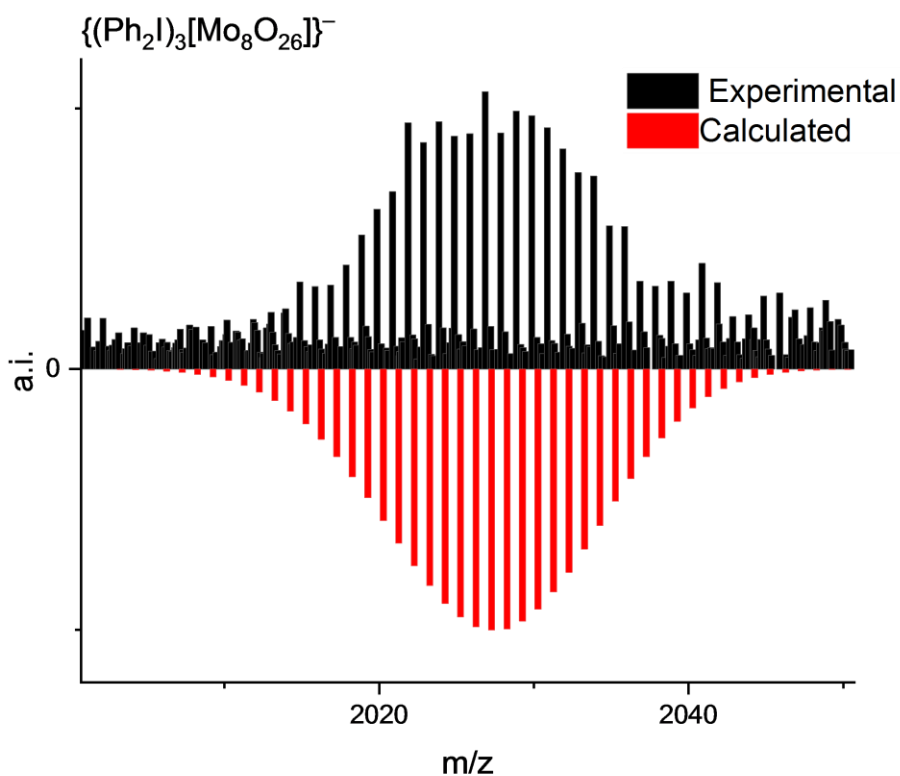

**Table S4.** ESI-MS spectra assignments for compound **2**.

| Species                                                   | Charge mode | Chemical Formula                                                 | Calculated, m/z | Found, m/z |
|-----------------------------------------------------------|-------------|------------------------------------------------------------------|-----------------|------------|
| $\{(\text{Ph}_2\text{I})_3[\text{Mo}_8\text{O}_{26}]\}^-$ | Negative    | $\text{C}_{36}\text{H}_{30}\text{I}_3\text{Mo}_8\text{O}_{26}^-$ | 2042.0597       | 2042.0606  |
| $\text{Ph}_2\text{I}^+$                                   | Positive    | $\text{C}_{12}\text{H}_{10}\text{I}^+$                           | 280.9822        | 280.9819   |

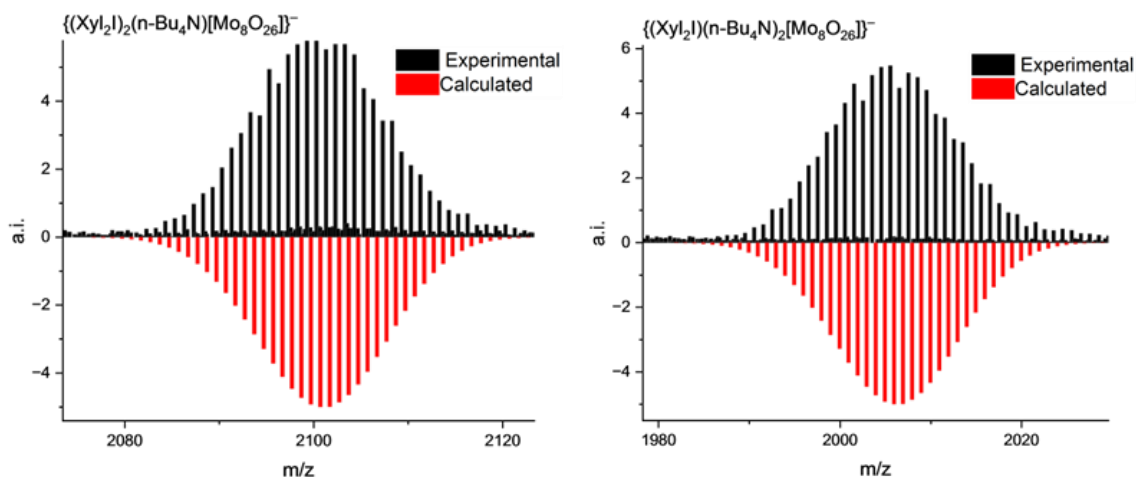

**Table S5.** ESI-MS spectra assignments for compound **4**.

| Species                                                                           | Charge mode | Chemical Formula                                                  | Calculated, m/z | Found, m/z |
|-----------------------------------------------------------------------------------|-------------|-------------------------------------------------------------------|-----------------|------------|
| $\{(\text{Xyl}_2\text{I})_2(n\text{-Bu}_4\text{N})[\text{Mo}_8\text{O}_{26}]\}^-$ | Negative    | $\text{C}_{48}\text{H}_{72}\text{I}_2\text{Mo}_8\text{NO}_{26}^-$ | 2115.487        | 2210.4850  |

|                                         |          |                                |           |           |
|-----------------------------------------|----------|--------------------------------|-----------|-----------|
| $\{(Xyl)_2I(n-Bu_4N)_2[Mo_8O_{26}]\}^-$ | Negative | $C_{48}H_{90}IMo_8N_2O_{26}^-$ | 2020.7265 | 2020.7343 |
| $Xyl_2I^+$                              | Positive | $C_{16}H_{18}I^+$              | 337.0448  | 337.0451  |
| $n-Bu_4N^+$                             | Positive | $C_{16}H_{36}N^+$              | 242.2842  | 242.2841  |

## References

- 1 L. Fotović, N. Bedeković and V. Stilinović, *Cryst. Growth Des.*, 2023, **23**, 3384–3392.
- 2 A. V. Chupina, V. Shayapov, A. S. Novikov, V. V. Volchek, E. Benassi, P. A. Abramov and M. N. Sokolov, *Dalt. Trans.*, 2020, **49**, 1522–1530.
- 3 L.-S. Wang, Y. Lu, G. M. Ó. Máille, S. P. Anthony, D. Nolan and S. M. Draper, *Inorg. Chem.*, 2016, **55**, 9497–9500.
- 4 J. Li, Y. Zhao, B. Huang, Y. Wang, Z. Xiong, B. Xiao, Y. Zhao, Z. Xiao and P. Wu, *J. Clust. Sci.*, 2022, **33**, 2375–2381.
- 5 D. Kuriakose and M. R. Prathapachandra Kurup, *Inorganica Chim. Acta*, 2020, **505**, 119472.
- 6 D. Kuriakose and M. R. P. Kurup, *Polyhedron*, 2019, **170**, 749–761.
- 7 M. Oszajca, E. Smrčok and W. Łasocha, *Acta Crystallogr. Sect. C Cryst. Struct. Commun.*, 2013, **69**, 1367–1372.
- 8 C. B. Aakeroy, D. L. Bryce, G. R. Desiraju, A. Frontera, A. C. Legon, F. Nicotra, K. Rissanen, S. Scheiner, G. Terraneo, P. Metrangolo and G. Resnati, *Pure Appl. Chem.*, 2019, **91**, 1889–1892.
- 9 I. I. Fedorova, N. S. Soldatova, D. M. Ivanov, K. Nikiforova, I. S. Aliyarova, M. S. Yusubov, P. M. Tolstoy, R. M. Gomila, A. Frontera, V. Y. Kukushkin, P. S. Postnikov and G. Resnati, *Cryst. Growth Des.*, 2023, **23**, 2661–2674.
- 10 X. L. Wang, J. Y. Zhang, Z. H. Chang, Z. Zhang, X. Wang, H. Y. Lin and Z. W. Cui, *Inorg. Chem.*, 2021, **60**, 3331–3337.
